# Supplementary material
Source: Elsevier journal article supplement (https://www.sciencedirect.com/science/article/pii/S0212656717300653)
Supplement: mmc1 [file S0212656717300653:mmc1.doc]

¿Qué se sabe sobre el tema?

El asma es la enfermedad crónica más prevalente en la infancia y en la adolescencia con un 11% y un 9% respectivamente. Dentro de los pocos estudios en zonas rurales, se encuetra el del noroeste de la zona rural de España con un 6,3% en niños y 15,3% en adolescentes. El asma se ha relacionado con factores instrísecos como infecciones, genética, prematuridad y externos: síntomas de asma, tabaco, lactancia materna, animales en el domicilio o el sedentarismo.

¿Qué añade el estudio a la literatura?

La prevalencia de asma referida en la zona rural es ligeramente superior en niños y en adolescentes (11,7% y 13,4% respectivamente) frente a la de la zona urbana y mayor en la población femenina y en el grupo de 13-14 años. Infecciones respiratorias y otros síntomas de asma están relacionados con el asma referida y con las sibilancias. Así como la utilización de los servicios de urgencias en el caso del asma.
